# Blood Levels of Macrophage Migration Inhibitory Factor after Successful Resuscitation from Cardiac Arrest

Christian Stoppe<sup>1,2,\*</sup>, Michael Fries<sup>3</sup>, Rolf Rossaint<sup>1</sup>, Gerrit Grieb<sup>2,4</sup>, Mark Coburn<sup>1</sup>, David Simons<sup>2,4</sup>, David Brücken<sup>5</sup>, Jürgen Bernhagen<sup>2</sup>, Norbert Pallua<sup>4</sup>, Steffen Rex<sup>1</sup>

**1** Department of Anaesthesiology, University Hospital of the RWTH Aachen, Aachen, Germany, **2** Institute of Biochemistry and Molecular Cell Biology, University Hospital of the RWTH Aachen, Aachen, Germany, **3** Department of Intensive Care, University Hospital of the RWTH Aachen, Aachen, Germany, **4** Department of Plastic Surgery, Hand Surgery, Burn Unit, University Hospital of the RWTH Aachen, Aachen, Germany, **5** Department of Orthopaedics and Trauma Surgery (main focus on trauma surgery), University Hospital of the RWTH Aachen, Aachen, Germany

## Abstract

**Introduction:** Ischemia-reperfusion injury following cardiopulmonary resuscitation (CPR) is associated with a systemic inflammatory response, resulting in post-resuscitation disease. In the present study we investigated the response of the pleiotropic inflammatory cytokine macrophage migration inhibitory factor (MIF) to CPR in patients admitted to the hospital after out-of-hospital cardiac arrest (OHCA). To describe the magnitude of MIF release, we compared the blood levels from CPR patients with those obtained in healthy volunteers and with an aged- and gender-matched group of patients undergoing cardiac surgery with the use of extracorporeal circulation.

**Methods:** Blood samples of 17 patients with return of spontaneous circulation (ROSC) after OHCA were obtained upon admission to the intensive care unit, and 6, 12, 24, 72 and 96 h later. Arrest and treatment related data were documented according to the Utstein style.

**Results:** In patients after ROSC, MIF levels at admission ( $475.2 \pm 157.8$  ng/ml) were significantly higher than in healthy volunteers ( $12.5 \pm 16.9$  ng/ml,  $p < 0.007$ ) and in patients after cardiac surgery ( $78.2 \pm 41.6$  ng/ml,  $p < 0.007$ ). Six hours after admission, MIF levels were decreased by more than 50% ( $150.5 \pm 127.2$  ng/ml,  $p < 0.007$ ), but were not further reduced in the subsequent time course and remained significantly higher than the values observed during the ICU stay of cardiac surgical patients. In this small group of patients, MIF levels could not discriminate between survivors and non-survivors and were not affected by treatment with mild therapeutic hypothermia.

**Conclusion:** MIF shows a rapid and pronounced increase following CPR, hence allowing a very early assessment of the inflammatory response. Further studies are warranted in larger patient groups to determine the prognostic significance of MIF.

**Trial Registration:** ClinicalTrials.gov NCT01412619

**Citation:** Stoppe C, Fries M, Rossaint R, Grieb G, Coburn M, et al. (2012) Blood Levels of Macrophage Migration Inhibitory Factor after Successful Resuscitation from Cardiac Arrest. PLoS ONE 7(4): e33512. doi:10.1371/journal.pone.0033512

**Editor:** Alice Y. W. Chang, Kaohsiung Chang Gung Memorial Hospital, Taiwan

**Received:** November 9, 2011; **Accepted:** February 9, 2012; **Published:** April 10, 2012

**Copyright:** © 2012 Stoppe et al. This is an open-access article distributed under the terms of the Creative Commons Attribution License, which permits unrestricted use, distribution, and reproduction in any medium, provided the original author and source are credited.

**Funding:** This study was supported by the Deutsche Forschungsgemeinschaft (DFG) grants Be1977/4-2 (TP1 of DFG-FOR809), GRK1508/1 (project P13), and Ra969/6-1 to JB. The funders had no role in study design, data collection and analysis, decision to publish, or preparation of the manuscript.

**Competing Interests:** The authors have declared that no competing interests exist.

\* E-mail: christian.stoppe@gmail.com

These authors contributed equally to this work.

## Introduction

Although the number of patients successfully resuscitated from cardiac arrest (CA) is increasing, the mortality rate in the post-resuscitation period is due to the severity of neurological and myocardial dysfunction still dramatically high [1]. Following cardiopulmonary resuscitation (CPR), complex changes including a systemic inflammatory response [2,3], myocardial dysfunction [4–6], endothelial activation [7], alterations of the coagulation system [5,8], adrenal insufficiency [9], hyperglycemia [10] and arterial hypotension [4,11] are frequently observed. Although some of these features have been described already several decades ago [12], the importance of the post-cardiac arrest syndrome has

only been recently underscored and highlighted in the latest CPR guidelines [13]. Interestingly, many of the features, which characterize the post-cardiac arrest syndrome are also frequently observed in patients with severe sepsis or septic shock, which has led to the synonym “sepsis-like syndrome” [14].

Macrophage migration inhibitory factor (MIF) is a pleiotropic inflammatory cytokine with chemokine-like functions, which is rapidly released from pre-formed cytoplasmic pools of several cell types (including monocytes/macrophages, B and T cells, endothelial and epithelial cells and cardiomyocytes), in response to various noxious stimuli such as infection, inflammation or hypoxia [15,16]. MIF plays a pivotal role in the control of the acute

immune response [17,18,19] and mediates the pathogenesis of acute and chronic inflammatory conditions, including rheumatoid arthritis, septic shock, acute respiratory distress syndrome and atherosclerosis by promoting and amplifying monocyte and macrophage survival, MAPK signalling and/ or cytokine release [15,18,20]. In sepsis, inhibition of the MIF pro-inflammatory activity has previously proven beneficial in numerous animal models of endotoxemia, and gram-negative and gram-positive septic shock [21–23]. In addition, recent studies observed a strong association between poor outcome and high levels of MIF in patients with severe systemic inflammation, organ failure and/ or acute respiratory distress syndrome [24,25,26].

In an apparent contrast, MIF has been demonstrated to offer protection from I/R-injury by activating adenosine monophosphate-activated protein kinase (AMPK) and inhibiting c-Jun N-terminal kinase (JNK)-induced apoptosis of cardiomyocytes [27,28].

Given the central involvement of MIF in immunological processes linked to I/R-injury, we hypothesized that MIF levels may exhibit an early increase in patients successfully resuscitated from OHCA.

We therefore investigated MIF serum levels in patients after out-of-hospital cardiac arrest (OHCA). To assess the magnitude of MIF release, we compared MIF serum levels of post cardiac arrest patients with those obtained in healthy volunteers and with an aged- and gender-matched group of patients undergoing cardiac surgery with the use of extracorporeal circulation and cardioplegic arrest.

## Materials and Methods

### Patients and study design

After approval of the study by the local institutional review board committee Aachen, 17 patients with cardiac arrest of non-traumatic origin and 17 gender- and aged-matched patients undergoing cardiac surgery with extracorporeal circulation and cardioplegic arrest were consecutively enrolled in this study. The study was registered at ClinicalTrials.gov (NCT number: NCT01412619) and the protocol for this trial and supporting CONSORT checklist are available as supporting information; see Checklist S1 and Protocol S1. The included patients after OHCA represent a random sample of a larger group of patients in which the influence of MTH on S-100 values after OHCA and predictive power after OHCA has been recently studied and published [29]. The study complied with the Declaration of Helsinki.

Exclusion criteria were age less than 18 years, severe pre-existing conditions including sepsis, stroke, previous CPR and cancer. Cardiac arrest was defined as the absence of respiration, palpable pulse and responsiveness to stimuli. CPR was performed in accordance to the European Resuscitation Council's (ERC) guidelines 2000, which were gradually replaced during the study period by the updated guidelines of 2005 [30]. After recovery of blood pressure and pulse for more than 1 hour after admission to the hospital, CPR was considered as "successful" and patients were included in this study.

### Treatment of patients

After completion of CPR and admission to the hospital, all patients were transferred to the intensive care unit (ICU) and received standardised intensive care treatment including mechanical ventilation, fluid substitution, tight glucose control, sepsis and vasopressor treatment. Additional interventions (e.g., heart catheterisation) were carried out if appropriate. The initiation of mild therapeutic hypothermia (MTH) was left at the discretion of

the attending physicians since not being a standard recommendation in the earlier ERC guidelines. MTH was induced using ice bags and infusion of cold fluids.

Tracheal extubation was performed when standard extubation criteria were fulfilled. Patients were discharged from the ICU after fulfilment of standardized clinical discharge criteria.

### Data collection

Baseline characteristics regarding demographic and CPR related parameters as well as clinical data were collected immediately after hospital admission in the emergency department (baseline) and 6, 12, 24, 72 and 120 hours after admission using a web-based data entry system complying with the Utstein-Style, initiated by the German Society of Anaesthesia and Intensive Care Medicine as part of a quality assurance system [31].

A standardized neurological assessment was performed by an independent physician, using the cerebral performance categories (CPC) after 14 days. CPC 1 and 2 were considered as favourable neurological outcome, whereas CPC 3 to 5 labelled adverse outcome [32].

**Table 1.** Baseline characteristics for patients after ROSC.

|                                   |               | Patients after ROSC<br>(n = 17) |               |
|-----------------------------------|---------------|---------------------------------|---------------|
| <b>Biometric/Demographic Data</b> |               |                                 |               |
| Age (years)                       | mean $\pm$ SD | 70                              | $\pm$ 12      |
|                                   | median [IQR]  | 74                              | [61–79]       |
| Sex, male                         | n (%)         | 10                              | (59)          |
| <b>Arrest related data</b>        |               |                                 |               |
| VF as initial rhythm              | n (%)         | 8                               | (47)          |
| Asystole as initial rhythm        | n (%)         | 6                               | (35)          |
| Cardiac origin                    | n (%)         | 13                              | (76)          |
| Call response interval (mm:ss)    | mean $\pm$ SD | 03:36                           | $\pm$ 01:32   |
|                                   | median [IQR]  | 04:00                           | [03:00–05:00] |
| Number of shocks                  | n [IQR]       | 1                               | [1–3]         |
| Arrest witnessed                  | n (%)         | 12                              | (71)          |
| Location at public place          | n (%)         | 5                               | (29)          |
| Location at home                  | n (%)         | 11                              | (65)          |
| <b>Treatment</b>                  |               |                                 |               |
| Early defibrillation              | n (%)         | 1                               | (6)           |
| Bystander CPR                     | n (%)         | 3                               | (18)          |
| Mild therapeutic hypothermia      | n (%)         | 9                               | (53)          |
| <b>Outcome</b>                    |               |                                 |               |
| Mean survival (days)              | median [IQR]  | 81                              | [52–192]      |
| Survivors                         | n (%)         | 8                               | (47)          |
| Good neurological recovery        | n (%)         | 5                               | (29)          |
|                                   | CPC (n)       | median [IQR]                    | 5 [2–5]       |

n = absolute number; (%) = percentage of the whole; IQR = interquartile range; SD = standard deviation. VF = ventricular fibrillation; CPR = cardiopulmonary resuscitation; CPC = cerebral performance categories.  
doi:10.1371/journal.pone.0033512.t001

**Table 2.** Baseline characteristics for patients after cardiac surgery.

|                                   |               | Patients after cardiac surgery<br>(n = 17) |       |           |
|-----------------------------------|---------------|--------------------------------------------|-------|-----------|
| <b>Biometric/Demographic Data</b> |               |                                            |       |           |
| Age (years)                       | mean $\pm$ SD | 70                                         | $\pm$ | 11        |
|                                   | median [IQR]  | 74                                         |       | [61–79]   |
| Sex, male                         | n (%)         | 10                                         |       | (59)      |
| Euroscore                         | median [IQR]  | 5                                          |       | [2–7]     |
| <b>Type of surgery</b>            |               |                                            |       |           |
| Isolated CABG                     | n (%)         | 6                                          |       | (35)      |
| Isolated valvular surgery         | n (%)         | 3                                          |       | (18)      |
| Aortic surgery                    | n (%)         | 1                                          |       | (6)       |
| Combined procedure                | n (%)         | 7                                          |       | (41)      |
| Duration of surgery (min)         | median [IQR]  | 188                                        |       | [156–254] |
| Ischemia time (min)               | mean $\pm$ SD | 61.8                                       | $\pm$ | 47.0      |
|                                   | median [IQR]  | 61.0                                       |       | [41–83]   |
| CPB Time (min)                    | mean $\pm$ SD | 108.3                                      | $\pm$ | 71.0      |
|                                   | median [IQR]  | 87                                         | $\pm$ | [70–125]  |

n = absolute number; (%) = percentage of the whole; IQR = interquartile range; SD = standard deviation.  
 CABG = coronary artery bypass graft; CPB = cardiopulmonary bypass.  
 doi:10.1371/journal.pone.0033512.t002

### Laboratory Tests

Serum samples for the determination of C-reactive protein (CRP), procalcitonin (PCT), tumor necrosis factor alpha (TNF- $\alpha$ ) and interleukin 6 (IL-6) and MIF were taken from the supernatant of blood collected for routine laboratory analyses at the predefined

time points. The inflammatory cytokines IL-6, TNF- $\alpha$  and the biomarkers CRP, PCT were quantified using commercially available automated systems (LIAison, DiaSorin, Dietzenbach, Germany, and KRYPTOR, Brahms AG, Hennigsdorf, Berlin, Germany). The serum levels of MIF were determined using an

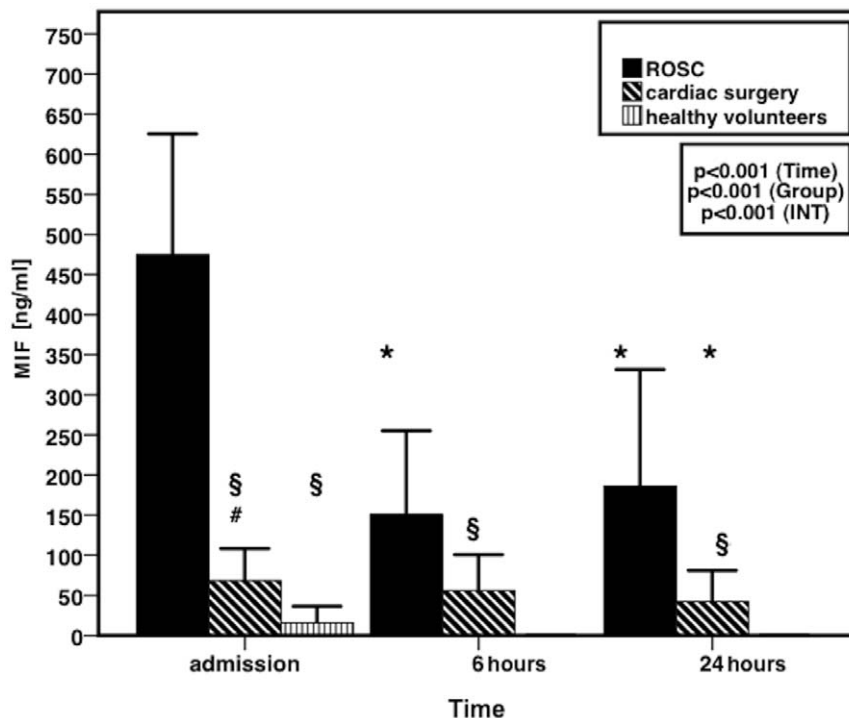

**Figure 1. Comparison of MIF levels in patients after ROSC with those obtained in patients after cardiac surgery.** Values are represented as mean  $\pm$  SD at predefined timepoints after successful CPR. MIF levels of healthy volunteers are additionally depicted at the time point "admission". \*  $p < 0.007$  vs. baseline.  $\$$   $p < 0.007$  vs patients after ROSC. #  $p < 0.007$  vs. group of healthy volunteers.  
 doi:10.1371/journal.pone.0033512.g001

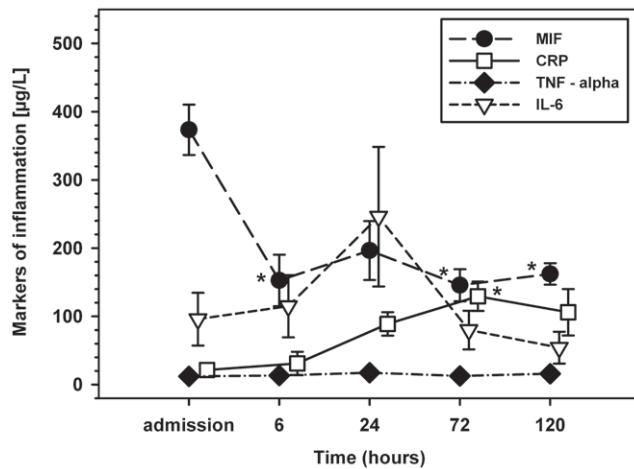

**Figure 2. Serum levels of MIF, TNF- $\alpha$ , IL-6 and CRP after admission to the ICU and 6, 24, 72 and 120 hours later.** \*  $p < 0.007$  vs. baseline. doi:10.1371/journal.pone.0033512.g002

enzyme-linked immunosorbent assay (ELISA) as previously described [15]. MIF levels of OHCA patients were compared with MIF values obtained from 30 healthy volunteers [33] and from 17 patients undergoing elective cardiac surgery at our hospital. After approval by the institutional review board and obtainment of written informed consent, the latter were identified as matched pairs using the variables gender and age. Cardiac surgery was performed with the use of extracorporeal circulation and cardioplegic arrest according to our institutional routine as described previously [34]. Cardiopulmonary bypass (CPB) was performed in moderate hypothermia (28°C–32°C) on a conventional CPB circuit with cardiac arrest induced by the antegrade infusion of cold crystalloid cardioplegic solution.

### Statistical Analysis

All data were statistically analysed using a commercially available software package (SPSS 17.0 (SPSS inc., Chicago, IL, USA). All data are expressed as mean  $\pm$  SD.

As primary endpoint, we studied the time course of MIF serum levels after successful resuscitation.

All data were checked for normal distribution using the Shapiro-Wilk-test. Differences between groups were compared

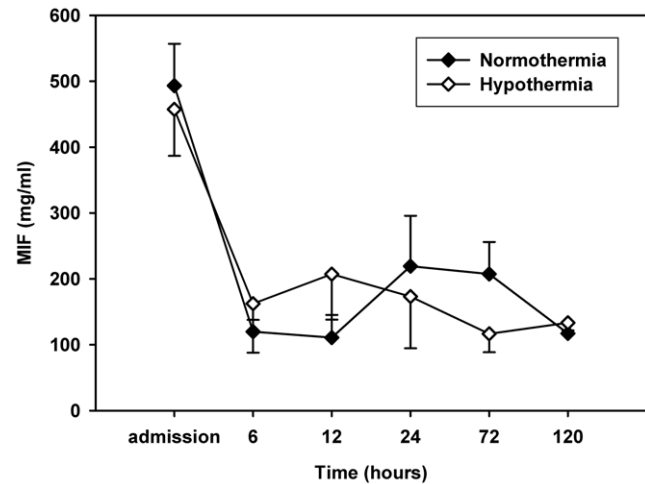

**Figure 3. MIF serum levels in patients who received MTH in comparison with normothermally treated patients.** Values are represented as mean  $\pm$  SD at predefined timepoints after successful CPR. doi:10.1371/journal.pone.0033512.g003

using a repeated measurement analysis of variance to take into account the correlated observations within the groups. As fixed effects, we included the within-factor time, the grouping factor pre-study treatment (patients after ROSC vs. patients after cardiac surgery), and the interaction effect (group  $\times$  time). The time-course of the various biomarkers within the OHCA-group was analysed using one-way-ANOVA. In case of significant results, post-hoc testing was performed using the Student's t-test with Bonferroni-adjustment for multiple measurements. The significance level of the fixed-effects results was adjusted for multiple hypotheses (i.e., for the number of all biomarkers ( $n = 7$ ) tested in the present investigation and in the study from which the present patients represent a random sample, see above). Hence, a  $p < 0.007$  was considered to indicate statistical significance.

### Results

Patients' characteristics and cardiac arrest-related data about treatment and outcome are presented in Table 1.

The characteristics of the matched cardiac surgical patients are depicted in Table 2. In patients after ROSC, MIF levels at admission were significantly higher than in healthy volunteers [age  $29 \pm 8$  years; male = 18 (60%)] and in patients after cardiac surgery

**Table 3. Comparison of time course of inflammatory reaction in patients after OHCA and after cardiac surgery as assessed by the serum levels of procalcitonin ( $\mu$ g/l).**

|                        | Admission     |                    | 24 hours |                   | 48 hours |                   | 72 hours        |        | 120 hours          |       |
|------------------------|---------------|--------------------|----------|-------------------|----------|-------------------|-----------------|--------|--------------------|-------|
| <b>OHCA</b>            | mean $\pm$ SD | 0.21 $\pm$ 0.35    | n = 17   | 7.16 $\pm$ 11.61  | n = 13   | n.a.              | 1.89 $\pm$ 3.18 | n = 11 | 0.44 $\pm$ 0.63    | n = 7 |
|                        | median [IQR]  | 0.08 [0.05 – 0.13] |          | 0.66 [0.19– 3.82] |          | n.a.              | 0.4 [0.19– 1.2] |        | 0.18 [0.09 – 0.36] |       |
| <b>Cardiac surgery</b> | mean $\pm$ SD | 0.58 $\pm$ 0.74    | n = 17   | 4.95 $\pm$ 13.24  | n = 17   | 11.63 $\pm$ 16.48 | n = 6           | n.a.   | n.a.               |       |
|                        | median [IQR]  | 0.4 [0.10 – 0.50]  |          | 1.30 [0.40– 2.30] |          | 5.45 [1.0 – 10.3] |                 | n.a.   | n.a.               |       |

IQR = interquartile range [IQR].

n.a. = not available.

Results of the overall RMANOVA:  $p = 0.71$  (group);  $p = 0.02$  (time);  $p = 0.59$  (interaction).

doi:10.1371/journal.pone.0033512.t003

(Fig. 1). There was a significant correlation between the call-response-interval and MIF levels upon admission ( $r = 0.652$ ;  $p = 0.041$ ). Six hours after admission, MIF levels decreased by more than 50%, but were not further reduced during the following time course and remained significantly higher than the values observed during the ICU stay of cardiac surgical patients (Fig. 1).

Of note, MIF levels peaked earlier than those of other inflammatory cytokines and sepsis markers. In comparison to CRP, TNF- $\alpha$  and IL-6, MIF showed its highest peak already at admission and was therefore the first cytokine to peak (Fig. 2). MIF then showed a second peak 24 h after admission to the hospital, which was paralleled by an IL-6 peak. In contrast, CRP levels were constantly increasing after admission. In order to compare the time course of inflammatory reaction in CPR patients with that after cardiac surgery, we additionally assessed the postoperative PCT release in the control group consisting of cardiac surgical patients. In both groups, PCT showed a similar time course with an increase reaching its maximum at 24–48 hours after admission to the ICU (Table 3).

The treatment with mild therapeutic hypothermia did not affect MIF serum levels (Fig. 3). In this small group of patients, MIF levels were neither able to discriminate between patients with good and bad neurological outcome nor to distinguish between survivors and non-survivors (Fig. 4).

## Discussion

The results of our study show that patients after OHCA exhibit a remarkable increase in serum protein levels of the pleiotropic cytokine MIF, which is positively correlated with the call-response-interval. MIF levels peak earlier and show a distinct dose/time response compared to other inflammatory and sepsis markers.

Successful CPR in patients after OHCA regularly elicits an ischemia/reperfusion-related release of proinflammatory cytokines and hence provokes a systemic inflammatory response. MIF is known to be expressed upstream during the inflammatory cascade [24]. During the pathogenesis of septic diseases, MIF plays a key role in up-regulating Toll-like receptor-4 (TLR-4), overriding glucocorticoid activity and stimulating the release of inflammatory cytokines such as TNF-, IL-1, IL-6 and IL-8 [17,20,24,35–37]. In

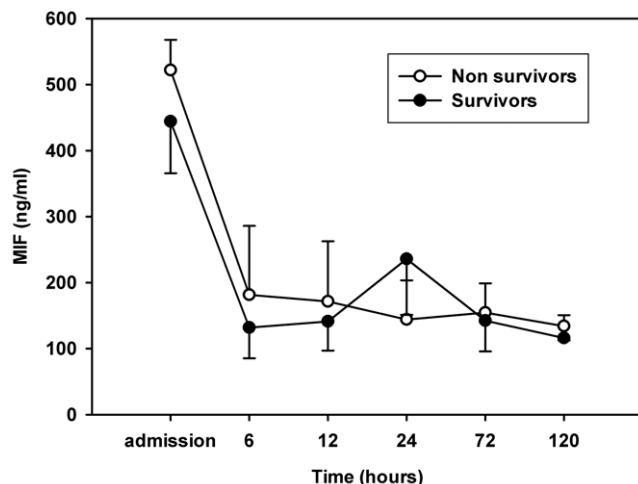

**Figure 4. MIF serum levels in survivors and non-survivors.** Values are represented as mean  $\pm$ SD at predefined timepoints after successful CPR.

doi:10.1371/journal.pone.0033512.g004

fact, we observed MIF to peak in advance of other key inflammatory cytokines.

MIF is an important mediator of I/R-injury being rapidly released in response to ischemia. Interestingly, our data indicate that the magnitude of MIF release is apparently related to the duration and the extent of ischemia. In our patients having suffered from total circulatory arrest and hence whole-body ischemia, MIF levels were correlated with call-response intervals that can be considered as a surrogate for ischemia time. Moreover, MIF levels at admission were increased nearly 30-fold in comparison with healthy volunteers (not having undergone ischemia), but “only” 9-fold in comparison with gender- and age-matched patients admitted to the ICU after cardiac surgery involving cardioplegic arrest and hence (in contrast to the OHCA-patients suffering from total circulatory arrest) “only” myocardial ischemia.

Recent evidence indicates that MIF can have both exacerbating (“inflammatory”) and protective (“anti-inflammatory”) effects in disease [18,15,38], but the mechanisms and details of the molecular decisions are only partly understood. In the context of the current study it is noteworthy of mentioning that secreted myocardial MIF is able to reduce I/R injury by suppressing apoptotic pathways and by activating the AMPK pathway through the MIF receptor CD74 [27,28,35].

On the other hand, studies in patients with severe systemic inflammation, organ failure and/or acute respiratory distress syndrome observed a strong association between poor outcome and high levels of MIF, which could be explained by its pro-inflammatory activity [17,37]. Likewise, studies in patients after cardiac surgery observed an association between MIF-release and the occurrence of organ dysfunction during the postoperative course [25,39]. These at first-sight contradictory observations may be readily explained by the complexity of the MIF/MIF receptor system. MIF not only interacts with CD74, but also engages in high affinity interactions with the chemokine receptors CXCR2 and CXCR4 to drive inflammatory leukocyte recruitment processes [18,26] and may mediate the inflammatory pathogenesis of experimental atherosclerosis [26]. Binding of MIF to the transmembrane protein CD74 induces its phosphorylation and the recruitment of CD44, that further activates Src family nonreceptor tyrosine kinases and leads to ERK1/2 phosphorylation [35]. In addition, MIF has intracellular activities [15] and most recently a MIF-like homolog, MIF-2 or DDT, has been identified to have similar but not identical effects in inflammatory disease [40]. In our limited patient trial circulating MIF levels did not allow to discriminate between survivors and non-survivors and were not able to identify patients with good neurological outcome. We could therefore not confirm that high levels of MIF are closely linked to the occurrence of adverse events. Likewise, previous studies also failed to show any differences in the plasma levels of PCT, IL-6 and CRP in survivors and non-survivors after OHCA [3].

Interestingly, MTH did not affect MIF plasma levels, while in previous studies, MTH was associated with a decrease of inflammatory cytokines [3]. This finding might be attributed to the fact that the MIF release primarily occurs in direct response to ischemia and hence prior to the initiation of MTH. In fact, the largest MIF-peak was observed at admission to the ICU.

We acknowledge that our study is subject to several limitations. The control-group consisting of healthy volunteers was not age-matched. However, it is unlikely that the elevation of MIF after OHCA is merely attributable to an age effect as MIF values after OHCA were significantly higher than those observed in an age-matched group after cardiac surgery. Second, the number of

included patients is relatively small. Hence, the study lacks statistical power to conclusively elucidate the prognostic significance of MIF after OHCA. Our results should therefore be considered as purely hypothesis-generating. Further studies are warranted to identify the prognostic role of MIF in a greater patient population. Our group has recently reported the prognostic significance of PCT levels in patients suffering from cardiac arrest [2]. However, MIF determinations in CPR patients could have a major clinical advantage as MIF peaks in advance to other inflammatory parameters, and this already at admission to the hospital. It has to be established whether MIF-determinations could offer early diagnostic evaluation and stratification of these patients upon admission to the hospital/intensive care unit. Third, it would have been very interesting to include a further control group of patients undergoing cardiovascular surgery with circulatory arrest and hence transitory whole body ischemia. On the other hand, validity of this comparison could be questioned due to the fact that – unlike during cardiac arrest - circulatory arrest during cardiac surgery is usually performed under the protection of deep hypothermia.

In conclusion, patients with successful resuscitation after OHCA show a remarkable increase of MIF serum levels upon admission

to the ICU. MIF is the first cytokine to peak after CPR. Further studies are warranted to assess the effects on organ dysfunction and prognostic role of this early MIF peak.

## Supporting Information

**Protocol S1** Trial Protocol.  
(DOC)

**Checklist S1** CONSORT Checklist.  
(DOC)

## Acknowledgments

We thank the laboratory staff from the Institute of Biochemistry and Molecular Cell Biology for excellent technical assistance.

## Author Contributions

Conceived and designed the experiments: CS MF GG DS RR NP JB SR. Performed the experiments: CS GG DS DB MC SR. Analyzed the data: CS MF RR GG DS JB SR. Contributed reagents/materials/analysis tools: CS GG MC DS DB NP JB. Wrote the paper: CS MF GG DS MC RR JB NP SR.

## References

- Laver S, Farrow C, Turner D, Nolan J (2004) Mode of death after admission to an intensive care unit following cardiac arrest. *Intensive Care Med* 30: 2126–8.
- Fries M, Kunz D, Gressner AM, Rossaint R, Kuhlen R (2003) Procalcitonin serum levels after out-of-hospital cardiac arrest. *Resuscitation* 59: 105–109.
- Fries M, Stoppe C, Brücken D, Rossaint R, Kuhlen R (2009) Influence of mild therapeutic hypothermia on the inflammatory response after successful resuscitation from cardiac arrest. *J Crit Care* 24: 453–7.
- Laurent I, Monchi M, Chiche JD, Joly LM, Spaulding C, et al. (2002) Reversible myocardial dysfunction in survivors of out-of-hospital cardiac arrest. *J Am Coll Cardiol* 40: 2110–2116.
- Neumar RW, Nolan JP, Adrie C, Aibiki M, Berg RA, et al. (2008) Post-cardiac arrest syndrome: epidemiology, pathophysiology, treatment, and prognostication. A consensus statement from the International Liaison Committee on Resuscitation (American Heart Association, Australian and New Zealand Council on Resuscitation, European Resuscitation Council, Heart and Stroke Foundation of Canada, InterAmerican Heart Foundation, Resuscitation Council of Asia, and the Resuscitation Council of Southern Africa); the American Heart Association Emergency Cardiovascular Care Committee; the Council on Cardiovascular Surgery and Anesthesia; the Council on Cardiopulmonary, Perioperative, and Critical Care; the Council on Clinical Cardiology; and the Stroke Council. *Circulation* 118: 2452–83.
- Adrie C, Adib-Conquy M, Laurent I, Monchi M, Vinsonneau C, et al. (2002) Successful cardiopulmonary resuscitation after cardiac arrest as a “sepsis-like” syndrome. *Circulation* 106: 562–8.
- Fink K, Schwarz M, Feldbrügge L, Bourgeois N, Helbing T, et al. (2010) Severe endothelial injury and subsequent repair in patients after successful cardiopulmonary resuscitation. *Crit Care* 14: R104.
- Gando S, Nanzaki S, Morimoto Y, Kobayashi S, Kemmotsu O (2000) Out-of-hospital cardiac arrest increases soluble vascular endothelial adhesion molecules and neutrophil elastase associated with endothelial injury. *Intensive Care Med* 26: 38–44.
- Kim JJ, Hyun SY, Hwang SY, Jung YB, Shin JH, et al. (2011) Hormonal responses upon return of spontaneous circulation after cardiac arrest: a retrospective cohort study. *Crit Care* 15: R53.
- Beiser DG, Carr GE, Edelson DP, Peberdy MA, Hoek TL (2009) Derangements in blood glucose following initial resuscitation from in-hospital cardiac arrest: a report from the national registry of cardiopulmonary resuscitation. *Resuscitation* 80: 624–30.
- Trzeciak S, Jones AE, Kilgannon JH, Milcarek B, Hunter K, et al. (2009) Significance of arterial hypotension after resuscitation from cardiac arrest. *Crit Care Med* 37: 2895–903.
- Negovsky VA, Gurvitch AM (1995) Post-resuscitation disease—a new nosological entity. Its reality and significance. *Resuscitation* 30: 23–7.
- Nolan JP, Soar J, Zideman DA, Biarent D, Bossaert LL, et al. (2010) European Resuscitation Council Guidelines for Resuscitation 2010 Section 1. Executive summary. *Resuscitation* 81: 1219–76.
- Adrie C, Laurent I, Monchi M, Cariou A, Dhainau JF, et al. (2004) Postresuscitation disease after cardiac arrest: a sepsis-like syndrome? *Curr Opin Crit Care* 10: 208–12.
- Calandra T, Roger T (2003) Macrophage migration inhibitory factor: a regulator of innate immunity. *Nat Rev Immunol* 3: 791–800.
- Simons D, Grieb G, Hristov M, Pallua N, Weber C, et al. (2011) Hypoxia-induced endothelial secretion of macrophage migration inhibitory factor and role in endothelial progenitor cell recruitment. *J Cell Mol Med* 15: 668–78.
- Calandra T, Bernhagen J, Mitchell RA, Bucala R (1994) The macrophage is an important and previously unrecognized source of macrophage migration inhibitory factor. *J Exp Med* 179: 1895–902.
- Zernecke A, Bernhagen J, Weber C (2008) Macrophage migration inhibitory factor in cardiovascular disease. *Circulation* 117: 1594–602.
- Noels H, Bernhagen J, Weber C (2009) Macrophage migration inhibitory factor: a noncanonical chemokine important in atherosclerosis. *Trends Cardiovasc Med* 19: 76–86.
- Morand EF, Leech M, Bernhagen J (2006) MIF: a new cytokine link between rheumatoid arthritis and atherosclerosis. *Nat Rev Drug Discov* 5: 399–410.
- Calandra T, Echtenacher B, Roy DL, Pugin J, Metz CN, et al. (2000) Protection from septic shock by neutralization of macrophage migration inhibitory factor. *Nat Med* 6: 164–170.
- Chagnon F, Metz CN, Bucala R, Lesur O (2005) Endotoxin-induced myocardial dysfunction: effects of macrophage migration inhibitory factor neutralization. *Circ Res* 96: 1095–1102.
- Sakuragi T, Lin X, Metz CN, Ojamaa K, Kohn N, et al. (2007) Lung-derived macrophage migration inhibitory factor in sepsis induces cardio-circulatory depression. *Surg Infect (Larchmt)* 8: 29–40.
- Calandra T, Bernhagen J, Metz CN, Spiegel LA, Bacher M, et al. (1995) MIF as a glucocorticoid-induced modulator of cytokine production. *Nature* 377: 68–71.
- de Mendonça-Filho HT, Pereira KC, Fontes M, Vieira DA, de Mendonça ML, et al. (2006) Circulating inflammatory mediators and organ dysfunction after cardiovascular surgery with cardiopulmonary bypass: a prospective observational study. *Crit Care* 10: 46.
- Bernhagen J, Krohn R, Lue H, Gregory JL, Zernecke A, et al. (2007) MIF is a noncognate ligand of CXC chemokine receptors in inflammatory and atherogenic cell recruitment. *Nat Med* 2007; 13: 587–96.
- Miller EJ, Li J, Leng L, McDonald C, Atsumi T, et al. (2008) Macrophage migration inhibitory factor stimulates AMP-activated protein kinase in the ischaemic heart. *Nature* 451: 578–582.
- Qi D, Hu X, Wu X, Merk M, Leng L, et al. (2009) Cardiac macrophage migration inhibitory factor inhibits JNK pathway activation and injury during ischemia/reperfusion. *J Clin Invest* 119: 3807–3816.
- Derwall M, Stoppe C, Brücken D, Rossaint R, Fries M (2009) Changes in S-100 protein serum levels in survivors of out-of-hospital cardiac arrest treated with mild therapeutic hypothermia: a prospective, observational study. *Crit Care* 13: R58.
- Nolan JP, Deakin CD, Soar J, Bottiger BW, Smith G (2005) European Resuscitation Council guidelines for resuscitation 2005. Section 4. Adult advanced life support. *Resuscitation* 67 Suppl 1: S39–86.
- Cummins RO, Chamberlain D, Hazinski MF, Nadkarni V, Kloeff W, et al. (1997) Recommended guidelines for reviewing, reporting, and conducting research on in-hospital resuscitation: The in-hospital ‘Utstein style’; a statement for healthcare professionals from the American Heart Association, the European Resuscitation Council, the Heart and Stroke Foundation of Canada, the Australian Resuscitation Council, and the Resuscitation Councils of South Africa. *Circulation* 95: 2213–39.

32. Safar P (1981) Resuscitation after Brain Ischemia. In: Brain Failure and Resuscitation Grenvik A, Safar P, eds. New York: Churchill Livingstone. pp 155–184.
33. Grieb G, Simons D, Piatkowski A, Bernhagen J, Steffens G, et al. (2010) Macrophage migration inhibitory factor-A potential diagnostic tool in severe burn injuries? *Burns* 36: 335–42.
34. Stoppe C, Schälte G, Rossaint R, Coburn M, Graf B, et al. (2011) The intraoperative decrease of selenium is associated with the postoperative development of multiorgan dysfunction in cardiac surgical patients. *Crit Care Med* 39: 1879–85.
35. Leng L, Metz CN, Fang Y, Xu J, Donnelly S, et al. (2003) MIF signal transduction initiated by binding to CD74. *J Exp Med* 197: 1467–76.
36. Bernhagen J, Mitchell RA, Calandra T, Voelker W, Cerami A, et al. (1994) Purification, bioactivity, and secondary structure analysis of mouse and human macrophage migration inhibitory factor (MIF). *Biochemistry* 33: 14144–55.
37. Roger T, David J, Glauser M, Calandra T (2001) MIF regulates innate immune responses through modulation of Toll-like receptor-4. *Nature* 414: 920–4.
38. Yende S, Angus DC, Kong L, Kellum JA, Weissfeld L, et al. (2009) The influence of macrophage migration inhibitory factor gene polymorphisms on outcome from community-acquired pneumonia. *FASEB J* 23: 2403–11.
39. Gando S, Nishihiro J, Kobayashi S, Morimoto Y, Nanzaki S, et al. (2001) Macrophage migration inhibitory factor is a critical mediator of systemic inflammatory response syndrome. *Intensive Care Med* 27: 1187–1193.
40. Merk M, Zierow S, Leng L, Das R, Du X, et al. (2011) The D-dopachrome tautomerase (DDT) gene product is a cytokine and functional homolog of macrophage migration inhibitory factor (MIF). *Proc Natl Acad Sci USA* 108: E577–85.
